# Supplementary material
Source: Elsevier journal article supplement (https://www.sciencedirect.com/science/article/pii/S2530064423000226)

Supporting Information

**Intraspecific variation of invaded pollination networks – the role of pollen-transport, pollen-transfer and different levels of biological organization**

Submitted to PECON

Content:

**Table S1**. Description of the species studied at the individual level within the pollen-transport and the pollen-transfer networks invaded by *Impatiens glandulifera* (balsam) in urban and semi-natural areas in the UK. Degree accounts for the sum of different pollen types pollinators carry on their bodies and/or deposited on stigmas.

**Table S2.** Code for species and individuals abbreviation used in Fig. 5 of the main text.

**Table S3**. Description of the studied pollen-transport and pollen-transfer networks, including the estimated parameters at the individual and at the species level.

**Fig S1**. Results from the Linear Mixed Models showing the interaction between network type and level in terms of degree, ie., the number of distinct pollen species/type carried by pollinators in the pollen transport networks and deposited on stigmas in the pollen transfer networks.

**Fig S2**. Results from the Linear Mixed Models showing the interaction between network type and level in terms of d’ specialization , ie., how different are the observed interactions performed by the target pollinators and plant species in comparison to a random distribution, for both pollen transport and pollen transfer networks.

**Fig S3**. Results from the Linear Mixed Models showing the differences on structural specialization of individual- and species-based pollen transport and pollen transfer networks. For pollen-transport networks, niche overlap is a proxy for the ‘use’ of the different pollen types on distinct pollinator’s bodies at the individual or species level. Likewise, for pollen-transfer networks, niche overlap is a proxy for the ‘use’ of the different pollen types on distinct flower’ stigmas at the individual or species level.

**Table S1.**

| **type** | **level** | **species** | **code** | **degree** | **Total number of pollen grains** | **Number of balsam pollen grains** | **site** | **status** |
| --- | --- | --- | --- | --- | --- | --- | --- | --- |
| transport | species | Apis mellifera | Apis mellifera | 10 | 106702.0 | 106669.0 | A | invaded |
| transport | individual | Apis mellifera | Am1 | 6 | 4400.0 | 4390.0 | A | invaded |
| transport | individual | Apis mellifera | Am10 | 1 | 1190.0 | 1190.0 | A | invaded |
| transport | individual | Apis mellifera | Am11 | 2 | 1609.0 | 1607.0 | A | invaded |
| transport | individual | Apis mellifera | Am2 | 3 | 809.0 | 807.0 | A | invaded |
| transport | individual | Apis mellifera | Am3 | 6 | 39079.0 | 39071.0 | A | invaded |
| transport | individual | Apis mellifera | Am4 | 3 | 10732.0 | 10728.0 | A | invaded |
| transport | individual | Apis mellifera | Am5 | 1 | 11684.0 | 11684.0 | A | invaded |
| transport | individual | Apis mellifera | Am6 | 2 | 8783.0 | 8779.0 | A | invaded |
| transport | individual | Apis mellifera | Am7 | 1 | 12988.0 | 12988.0 | A | invaded |
| transport | individual | Apis mellifera | Am8 | 1 | 11138.0 | 11138.0 | A | invaded |
| transport | individual | Apis mellifera | Am9 | 3 | 4290.0 | 4287.0 | A | invaded |
| transport | species | Bombus pascuorum | Bombus pascuorum | 10 | 51783.0 | 51696.0 | A | invaded |
| transport | individual | Bombus pascuorum | Bp1 | 4 | 2036.0 | 1987.0 | A | invaded |
| transport | individual | Bombus pascuorum | Bp2 | 4 | 4159.0 | 4155.0 | A | invaded |
| transport | individual | Bombus pascuorum | Bp3 | 3 | 18825.0 | 18822.0 | A | invaded |
| transport | individual | Bombus pascuorum | Bp4 | 3 | 4914.0 | 4912.0 | A | invaded |
| transport | individual | Bombus pascuorum | Bp5 | 6 | 7074.0 | 7064.0 | A | invaded |
| transport | individual | Bombus pascuorum | Bp6 | 3 | 4020.0 | 4007.0 | A | invaded |
| transport | individual | Bombus pascuorum | Bp7 | 2 | 8378.0 | 8376.0 | A | invaded |
| transport | individual | Bombus pascuorum | Bp8 | 2 | 2139.0 | 2137.0 | A | invaded |
| transport | individual | Bombus pascuorum | Bp9 | 2 | 238.0 | 236.0 | A | invaded |
| transport | species | Bombus pascuorum | Bombus pascuorum | 14 | 104646.0 | 104410.0 | B | invaded |
| transport | individual | Bombus pascuorum | Bp1 | 6 | 194.0 | 78.0 | B | invaded |
| transport | individual | Bombus pascuorum | Bp10 | 3 | 8028.0 | 8021.0 | B | invaded |
| transport | individual | Bombus pascuorum | Bp11 | 1 | 7170.0 | 7170.0 | B | invaded |
| transport | individual | Bombus pascuorum | Bp12 | 1 | 10774.0 | 10774.0 | B | invaded |
| transport | individual | Bombus pascuorum | Bp13 | 5 | 4596.0 | 4586.0 | B | invaded |
| transport | individual | Bombus pascuorum | Bp14 | 2 | 769.0 | 758.0 | B | invaded |
| transport | individual | Bombus pascuorum | Bp15 | 3 | 1951.0 | 1949.0 | B | invaded |
| transport | individual | Bombus pascuorum | Bp2 | 2 | 6881.0 | 6880.0 | B | invaded |
| transport | individual | Bombus pascuorum | Bp3 | 5 | 24524.0 | 24512.0 | B | invaded |
| transport | individual | Bombus pascuorum | Bp4 | 3 | 4560.0 | 4557.0 | B | invaded |
| transport | individual | Bombus pascuorum | Bp5 | 2 | 10429.0 | 10425.0 | B | invaded |
| transport | individual | Bombus pascuorum | Bp6 | 2 | 4179.0 | 4177.0 | B | invaded |
| transport | individual | Bombus pascuorum | Bp7 | 1 | 8718.0 | 8718.0 | B | invaded |
| transport | individual | Bombus pascuorum | Bp8 | 1 | 5195.0 | 5195.0 | B | invaded |
| transport | individual | Bombus pascuorum | Bp9 | 5 | 6678.0 | 6610.0 | B | invaded |
| transport | species | Apis mellifera | Apis mellifera | 6 | 50557.0 | 50544.0 | C | invaded |
| transport | individual | Apis mellifera | Am1 | 2 | 9160.0 | 9159.0 | C | invaded |
| transport | individual | Apis mellifera | Am2 | 2 | 5583.0 | 5580.0 | C | invaded |
| transport | individual | Apis mellifera | Am3 | 4 | 13567.0 | 13560.0 | C | invaded |
| transport | individual | Apis mellifera | Am4 | 1 | 4302.0 | 4302.0 | C | invaded |
| transport | individual | Apis mellifera | Am5 | 1 | 4079.0 | 4079.0 | C | invaded |
| transport | individual | Apis mellifera | Am6 | 1 | 3164.0 | 3164.0 | C | invaded |
| transport | individual | Apis mellifera | Am7 | 1 | 3090.0 | 3090.0 | C | invaded |
| transport | individual | Apis mellifera | Am8 | 1 | 4731.0 | 4731.0 | C | invaded |
| transport | individual | Apis mellifera | Am9 | 2 | 2881.0 | 2879.0 | C | invaded |
| transport | species | Bombus pascuorum | Bombus pascuorum | 15 | 169885.0 | 169450.0 | C | invaded |
| transport | individual | Bombus pascuorum | Bp1 | 1 | 23049.0 | 23049.0 | C | invaded |
| transport | individual | Bombus pascuorum | Bp10 | 1 | 1615.0 | 1615.0 | C | invaded |
| transport | individual | Bombus pascuorum | Bp11 | 3 | 3608.0 | 3605.0 | C | invaded |
| transport | individual | Bombus pascuorum | Bp12 | 4 | 6161.0 | 6149.0 | C | invaded |
| transport | individual | Bombus pascuorum | Bp13 | 1 | 5425.0 | 5425.0 | C | invaded |
| transport | individual | Bombus pascuorum | Bp14 | 1 | 6145.0 | 6145.0 | C | invaded |
| transport | individual | Bombus pascuorum | Bp15 | 1 | 8097.0 | 8097.0 | C | invaded |
| transport | individual | Bombus pascuorum | Bp16 | 2 | 5398.0 | 5395.0 | C | invaded |
| transport | individual | Bombus pascuorum | Bp17 | 1 | 8359.0 | 8359.0 | C | invaded |
| transport | individual | Bombus pascuorum | Bp18 | 4 | 1662.0 | 1635.0 | C | invaded |
| transport | individual | Bombus pascuorum | Bp19 | 1 | 4135.0 | 4135.0 | C | invaded |
| transport | individual | Bombus pascuorum | Bp2 | 3 | 6037.0 | 6033.0 | C | invaded |
| transport | individual | Bombus pascuorum | Bp20 | 1 | 2669.0 | 2669.0 | C | invaded |
| transport | individual | Bombus pascuorum | Bp21 | 4 | 2957.0 | 2668.0 | C | invaded |
| transport | individual | Bombus pascuorum | Bp3 | 4 | 5927.0 | 5910.0 | C | invaded |
| transport | individual | Bombus pascuorum | Bp4 | 4 | 9286.0 | 9265.0 | C | invaded |
| transport | individual | Bombus pascuorum | Bp5 | 3 | 2282.0 | 2268.0 | C | invaded |
| transport | individual | Bombus pascuorum | Bp6 | 2 | 40343.0 | 40333.0 | C | invaded |
| transport | individual | Bombus pascuorum | Bp7 | 3 | 17411.0 | 17407.0 | C | invaded |
| transport | individual | Bombus pascuorum | Bp8 | 3 | 1902.0 | 1891.0 | C | invaded |
| transport | individual | Bombus pascuorum | Bp9 | 3 | 7417.0 | 7397.0 | C | invaded |
| transport | species | Apis mellifera | Apis mellifera | 5 | 63866.0 | 63858.0 | D | invaded |
| transport | individual | Apis mellifera | Am1 | 2 | 3573.0 | 3572.0 | D | invaded |
| transport | individual | Apis mellifera | Am2 | 2 | 13463.0 | 13460.0 | D | invaded |
| transport | individual | Apis mellifera | Am3 | 2 | 17573.0 | 17571.0 | D | invaded |
| transport | individual | Apis mellifera | Am4 | 1 | 7840.0 | 7840.0 | D | invaded |
| transport | individual | Apis mellifera | Am5 | 1 | 3421.0 | 3421.0 | D | invaded |
| transport | individual | Apis mellifera | Am6 | 1 | 3891.0 | 3891.0 | D | invaded |
| transport | individual | Apis mellifera | Am7 | 2 | 2741.0 | 2739.0 | D | invaded |
| transport | individual | Apis mellifera | Am8 | 1 | 8180.0 | 8180.0 | D | invaded |
| transport | individual | Apis mellifera | Am9 | 1 | 3184.0 | 3184.0 | D | invaded |
| transfer | species | Calystegia sepium | Calystegia sepium | 15 | 45.0 | 10328.0 | s1 | invaded |
| transfer | individual | Calystegia sepium | Cs1 | 8 | 8.0 | 1974.0 | s1 | invaded |
| transfer | individual | Calystegia sepium | Cs2 | 6 | 6.0 | 1655.0 | s1 | invaded |
| transfer | individual | Calystegia sepium | Cs3 | 9 | 9.0 | 2519.0 | s1 | invaded |
| transfer | individual | Calystegia sepium | Cs4 | 7 | 7.0 | 1169.0 | s1 | invaded |
| transfer | individual | Calystegia sepium | Cs5 | 5 | 5.0 | 719.0 | s1 | invaded |
| transfer | individual | Calystegia sepium | Cs6 | 5 | 5.0 | 1665.0 | s1 | invaded |
| transfer | individual | Calystegia sepium | Cs7 | 5 | 5.0 | 627.0 | s1 | invaded |
| transfer | species | Calystegia sepium | Calystegia sepium | 14 | 1390.0 | 156.0 | s2 | non-invaded |
| transfer | individual | Calystegia sepium | Cs1 | 6 | 458.0 | 70.0 | s2 | non-invaded |
| transfer | individual | Calystegia sepium | Cs2 | 6 | 102.0 | 0.0 | s2 | non-invaded |
| transfer | individual | Calystegia sepium | Cs3 | 9 | 283.0 | 36.0 | s2 | non-invaded |
| transfer | individual | Calystegia sepium | Cs4 | 5 | 352.0 | 50.0 | s2 | non-invaded |
| transfer | individual | Calystegia sepium | Cs5 | 6 | 195.0 | 0.0 | s2 | non-invaded |
| transfer | species | Calystegia sepium | Calystegia sepium | 13 | 84.0 | 2307.0 | s4 | invaded |
| transfer | individual | Calystegia sepium | Cs1 | 7 | 7.0 | 102.0 | s4 | invaded |
| transfer | individual | Calystegia sepium | Cs10 | 7 | 7.0 | 41.0 | s4 | invaded |
| transfer | individual | Calystegia sepium | Cs11 | 5 | 5.0 | 101.0 | s4 | invaded |
| transfer | individual | Calystegia sepium | Cs12 | 8 | 8.0 | 141.0 | s4 | invaded |
| transfer | individual | Calystegia sepium | Cs2 | 5 | 9.0 | 552.0 | s4 | invaded |
| transfer | individual | Calystegia sepium | Cs3 | 7 | 10.0 | 464.0 | s4 | invaded |
| transfer | individual | Calystegia sepium | Cs4 | 6 | 6.0 | 184.0 | s4 | invaded |
| transfer | individual | Calystegia sepium | Cs5 | 7 | 7.0 | 158.0 | s4 | invaded |
| transfer | individual | Calystegia sepium | Cs6 | 6 | 6.0 | 90.0 | s4 | invaded |
| transfer | individual | Calystegia sepium | Cs7 | 5 | 5.0 | 7.0 | s4 | invaded |
| transfer | individual | Calystegia sepium | Cs8 | 7 | 7.0 | 217.0 | s4 | invaded |
| transfer | individual | Calystegia sepium | Cs9 | 7 | 7.0 | 250.0 | s4 | invaded |
| transfer | species | Calystegia sepium | Calystegia sepium | 6 | 2860.0 | 1968.0 | s5 | non-invaded |
| transfer | individual | Calystegia sepium | Cs1 | 3 | 978.0 | 690.0 | s5 | non-invaded |
| transfer | individual | Calystegia sepium | Cs2 | 3 | 537.0 | 349.0 | s5 | non-invaded |
| transfer | individual | Calystegia sepium | Cs3 | 4 | 367.0 | 220.0 | s5 | non-invaded |
| transfer | individual | Calystegia sepium | Cs4 | 6 | 447.0 | 235.0 | s5 | non-invaded |
| transfer | individual | Calystegia sepium | Cs5 | 4 | 531.0 | 474.0 | s5 | non-invaded |
| transfer | species | Calystegia sepium | Calystegia sepium | 7 | 21.0 | 0.0 | s13 | non-invaded |
| transfer | individual | Calystegia sepium | Cs1 | 2 | 2.0 | 0.0 | s13 | non-invaded |
| transfer | individual | Calystegia sepium | Cs2 | 2 | 2.0 | 0.0 | s13 | non-invaded |
| transfer | individual | Calystegia sepium | Cs3 | 2 | 2.0 | 0.0 | s13 | non-invaded |
| transfer | individual | Calystegia sepium | Cs4 | 4 | 4.0 | 0.0 | s13 | non-invaded |
| transfer | individual | Calystegia sepium | Cs5 | 2 | 2.0 | 0.0 | s13 | non-invaded |
| transfer | individual | Calystegia sepium | Cs6 | 5 | 5.0 | 0.0 | s13 | non-invaded |
| transfer | individual | Calystegia sepium | Cs7 | 4 | 4.0 | 0.0 | s13 | non-invaded |
| transfer | species | Calystegia sepium | Calystegia sepium | 6 | 25.0 | 402.0 | s17 | non-invaded |
| transfer | individual | Calystegia sepium | Cs1 | 4 | 4.0 | 99.0 | s17 | non-invaded |
| transfer | individual | Calystegia sepium | Cs2 | 5 | 5.0 | 49.0 | s17 | non-invaded |
| transfer | individual | Calystegia sepium | Cs3 | 3 | 3.0 | 59.0 | s17 | non-invaded |
| transfer | individual | Calystegia sepium | Cs4 | 4 | 4.0 | 66.0 | s17 | non-invaded |
| transfer | individual | Calystegia sepium | Cs5 | 5 | 5.0 | 101.0 | s17 | non-invaded |
| transfer | individual | Calystegia sepium | Cs6 | 4 | 4.0 | 28.0 | s17 | non-invaded |
| transfer | species | Circaea lutetiana | Circaea lutetiana | 19 | 146.0 | 923.0 | s1 | invaded |
| transfer | individual | Circaea lutetiana | Cl1 | 2 | 2.0 | 383.7 | s1 | invaded |
| transfer | individual | Circaea lutetiana | Cl10 | 3 | 3.0 | 0.7 | s1 | invaded |
| transfer | individual | Circaea lutetiana | Cl11 | 3 | 3.0 | 3.3 | s1 | invaded |
| transfer | individual | Circaea lutetiana | Cl12 | 1 | 1.0 |  | s1 | invaded |
| transfer | individual | Circaea lutetiana | Cl13 | 6 | 6.0 | 3.0 | s1 | invaded |
| transfer | individual | Circaea lutetiana | Cl14 | 2 | 2.0 |  | s1 | invaded |
| transfer | individual | Circaea lutetiana | Cl15 | 4 | 4.0 | 0.3 | s1 | invaded |
| transfer | individual | Circaea lutetiana | Cl16 | 3 | 3.0 | 1.7 | s1 | invaded |
| transfer | individual | Circaea lutetiana | Cl17 | 2 | 2.0 | 2.3 | s1 | invaded |
| transfer | individual | Circaea lutetiana | Cl18 | 2 | 2.0 | 2.0 | s1 | invaded |
| transfer | individual | Circaea lutetiana | Cl19 | 3 | 3.0 | 6.7 | s1 | invaded |
| transfer | individual | Circaea lutetiana | Cl2 | 2 | 2.0 | 91.3 | s1 | invaded |
| transfer | individual | Circaea lutetiana | Cl20 | 4 | 4.0 | 3.0 | s1 | invaded |
| transfer | individual | Circaea lutetiana | Cl21 | 3 | 3.0 | 1.0 | s1 | invaded |
| transfer | individual | Circaea lutetiana | Cl22 | 2 | 2.0 | 53.3 | s1 | invaded |
| transfer | individual | Circaea lutetiana | Cl23 | 2 | 2.0 | 1.0 | s1 | invaded |
| transfer | individual | Circaea lutetiana | Cl24 | 2 | 2.0 | 9.0 | s1 | invaded |
| transfer | individual | Circaea lutetiana | Cl25 | 2 | 2.0 | 1.7 | s1 | invaded |
| transfer | individual | Circaea lutetiana | Cl26 | 2 | 2.0 | 2.3 | s1 | invaded |
| transfer | individual | Circaea lutetiana | Cl27 | 1 | 1.0 | 0.0 | s1 | invaded |
| transfer | individual | Circaea lutetiana | Cl28 | 1 | 1.0 | 0.0 | s1 | invaded |
| transfer | individual | Circaea lutetiana | Cl29 | 5 | 5.0 | 40.0 | s1 | invaded |
| transfer | individual | Circaea lutetiana | Cl3 | 2 | 2.0 | 9.3 | s1 | invaded |
| transfer | individual | Circaea lutetiana | Cl30 | 4 | 4.0 | 0.0 | s1 | invaded |
| transfer | individual | Circaea lutetiana | Cl31 | 6 | 6.0 | 0.0 | s1 | invaded |
| transfer | individual | Circaea lutetiana | Cl32 | 6 | 6.0 | 0.7 | s1 | invaded |
| transfer | individual | Circaea lutetiana | Cl33 | 3 | 3.0 | 1.3 | s1 | invaded |
| transfer | individual | Circaea lutetiana | Cl34 | 3 | 3.0 | 25.3 | s1 | invaded |
| transfer | individual | Circaea lutetiana | Cl35 | 4 | 4.0 | 0.0 | s1 | invaded |
| transfer | individual | Circaea lutetiana | Cl36 | 6 | 7.0 | 0.0 | s1 | invaded |
| transfer | individual | Circaea lutetiana | Cl37 | 2 | 2.0 | 0.0 | s1 | invaded |
| transfer | individual | Circaea lutetiana | Cl38 | 4 | 4.0 | 3.3 | s1 | invaded |
| transfer | individual | Circaea lutetiana | Cl39 | 3 | 3.0 | 0.0 | s1 | invaded |
| transfer | individual | Circaea lutetiana | Cl4 | 2 | 2.0 | 3.0 | s1 | invaded |
| transfer | individual | Circaea lutetiana | Cl40 | 3 | 3.0 | 9.0 | s1 | invaded |
| transfer | individual | Circaea lutetiana | Cl41 | 4 | 4.0 | 0.3 | s1 | invaded |
| transfer | individual | Circaea lutetiana | Cl42 | 5 | 5.0 | 1.7 | s1 | invaded |
| transfer | individual | Circaea lutetiana | Cl43 | 4 | 4.0 | 27.7 | s1 | invaded |
| transfer | individual | Circaea lutetiana | Cl44 | 3 | 3.0 | 1.0 | s1 | invaded |
| transfer | individual | Circaea lutetiana | Cl45 | 6 | 6.0 | 92.7 | s1 | invaded |
| transfer | individual | Circaea lutetiana | Cl46 | 4 | 4.0 | 0.3 | s1 | invaded |
| transfer | individual | Circaea lutetiana | Cl47 | 3 | 3.0 | 0.0 | s1 | invaded |
| transfer | individual | Circaea lutetiana | Cl5 | 2 | 2.0 | 116.7 | s1 | invaded |
| transfer | individual | Circaea lutetiana | Cl6 | 2 | 2.0 | 13.7 | s1 | invaded |
| transfer | individual | Circaea lutetiana | Cl7 | 3 | 3.0 | 5.0 | s1 | invaded |
| transfer | individual | Circaea lutetiana | Cl8 | 2 | 2.0 | 5.7 | s1 | invaded |
| transfer | individual | Circaea lutetiana | Cl9 | 2 | 2.0 | 0.0 | s1 | invaded |
| transfer | species | Circaea lutetiana | Circaea lutetiana | 8 | 512.3 | 0.7 | s5 | invaded |
| transfer | individual | Circaea lutetiana | Cl1 | 5 | 4.0 | 0.7 | s5 | invaded |
| transfer | individual | Circaea lutetiana | Cl10 | 3 | 63.3 | 0.0 | s5 | invaded |
| transfer | individual | Circaea lutetiana | Cl11 | 3 | 21.0 | 0.0 | s5 | invaded |
| transfer | individual | Circaea lutetiana | Cl19 | 2 | 24.3 | 0.0 | s5 | invaded |
| transfer | individual | Circaea lutetiana | Cl2 | 4 | 23.3 | 0.0 | s5 | invaded |
| transfer | individual | Circaea lutetiana | Cl20 | 5 | 58.0 | 0.0 | s5 | invaded |
| transfer | individual | Circaea lutetiana | Cl3 | 3 | 64.7 | 0.0 | s5 | invaded |
| transfer | individual | Circaea lutetiana | Cl4 | 2 | 57.7 | 0.0 | s5 | invaded |
| transfer | individual | Circaea lutetiana | Cl5 | 5 | 36.3 | 0.0 | s5 | invaded |
| transfer | individual | Circaea lutetiana | Cl6 | 2 | 30.7 | 0.0 | s5 | invaded |
| transfer | individual | Circaea lutetiana | Cl7 | 4 | 94.0 | 0.0 | s5 | invaded |
| transfer | individual | Circaea lutetiana | Cl8 | 1 | 0.3 | 0.0 | s5 | invaded |
| transfer | individual | Circaea lutetiana | Cl9 | 2 | 34.7 | 0.0 | s5 | invaded |
| transfer | species | Circaea lutetiana | Circaea lutetiana | 2 | 311.7 | 269.3 | s16 | invaded |
| transfer | individual | Circaea lutetiana | Cl1 | 2 | 67.0 | 51.0 | s16 | invaded |
| transfer | individual | Circaea lutetiana | Cl2 | 2 | 37.0 | 36.3 | s16 | invaded |
| transfer | individual | Circaea lutetiana | Cl3 | 1 | 43.3 | 43.3 | s16 | invaded |
| transfer | individual | Circaea lutetiana | Cl4 | 2 | 41.0 | 15.7 | s16 | invaded |
| transfer | individual | Circaea lutetiana | Cl5 | 1 | 10.3 | 10.3 | s16 | invaded |
| transfer | individual | Circaea lutetiana | Cl6 | 1 | 55.0 | 55.0 | s16 | invaded |
| transfer | individual | Circaea lutetiana | Cl7 | 2 | 33.0 | 32.7 | s16 | invaded |
| transfer | individual | Circaea lutetiana | Cl8 | 1 | 25.0 | 25.0 | s16 | invaded |
| transfer | species | Circaea lutetiana | Circaea lutetiana | 6 | 203.0 | 0.7 | s18 | invaded |
| transfer | individual | Circaea lutetiana | Cl1 | 3 | 50.0 | 0.0 | s18 | invaded |
| transfer | individual | Circaea lutetiana | Cl2 | 1 | 39.0 | 0.0 | s18 | invaded |
| transfer | individual | Circaea lutetiana | Cl3 | 2 | 34.0 | 0.0 | s18 | invaded |
| transfer | individual | Circaea lutetiana | Cl4 | 3 | 16.7 | 0.3 | s18 | invaded |
| transfer | individual | Circaea lutetiana | Cl5 | 4 | 21.3 | 0.3 | s18 | invaded |
| transfer | individual | Circaea lutetiana | Cl6 | 1 | 42.0 | 0.0 | s18 | invaded |
| transfer | species | Circaea lutetiana | Circaea lutetiana | 6 | 35.0 | 1.7 | s19 | invaded |
| transfer | individual | Circaea lutetiana | Cl1 | 1 | 1.0 | 0.0 | s19 | invaded |
| transfer | individual | Circaea lutetiana | Cl10 | 3 | 3.0 | 0.3 | s19 | invaded |
| transfer | individual | Circaea lutetiana | Cl11 | 1 | 1.0 | 0.0 | s19 | invaded |
| transfer | individual | Circaea lutetiana | Cl12 | 1 | 1.0 | 0.0 | s19 | invaded |
| transfer | individual | Circaea lutetiana | Cl13 | 1 | 1.0 | 0.0 | s19 | invaded |
| transfer | individual | Circaea lutetiana | Cl14 | 1 | 1.0 | 0.0 | s19 | invaded |
| transfer | individual | Circaea lutetiana | Cl15 | 1 | 1.0 | 0.0 | s19 | invaded |
| transfer | individual | Circaea lutetiana | Cl16 | 1 | 1.0 | 0.0 | s19 | invaded |
| transfer | individual | Circaea lutetiana | Cl17 | 1 | 1.0 | 0.0 | s19 | invaded |
| transfer | individual | Circaea lutetiana | Cl18 | 1 | 1.0 | 0.0 | s19 | invaded |
| transfer | individual | Circaea lutetiana | Cl19 | 1 | 1.0 | 0.0 | s19 | invaded |
| transfer | individual | Circaea lutetiana | Cl2 | 1 | 1.0 | 0.0 | s19 | invaded |
| transfer | individual | Circaea lutetiana | Cl20 | 2 | 2.0 | 0.5 | s19 | invaded |
| transfer | individual | Circaea lutetiana | Cl21 | 1 | 1.0 | 0.0 | s19 | invaded |
| transfer | individual | Circaea lutetiana | Cl22 | 2 | 2.0 | 0.5 | s19 | invaded |
| transfer | individual | Circaea lutetiana | Cl23 | 1 | 1.0 | 0.0 | s19 | invaded |
| transfer | individual | Circaea lutetiana | Cl24 | 2 | 2.0 | 0.3 | s19 | invaded |
| transfer | individual | Circaea lutetiana | Cl25 | 1 | 1.0 | 0.0 | s19 | invaded |
| transfer | individual | Circaea lutetiana | Cl26 | 1 | 1.0 | 0.0 | s19 | invaded |
| transfer | individual | Circaea lutetiana | Cl27 | 1 | 1.0 | 0.0 | s19 | invaded |
| transfer | individual | Circaea lutetiana | Cl3 | 1 | 1.0 | 0.0 | s19 | invaded |
| transfer | individual | Circaea lutetiana | Cl4 | 1 | 1.0 | 0.0 | s19 | invaded |
| transfer | individual | Circaea lutetiana | Cl5 | 1 | 1.0 | 0.0 | s19 | invaded |
| transfer | individual | Circaea lutetiana | Cl6 | 1 | 1.0 | 0.0 | s19 | invaded |
| transfer | individual | Circaea lutetiana | Cl7 | 3 | 3.0 | 0.0 | s19 | invaded |
| transfer | individual | Circaea lutetiana | Cl8 | 1 | 1.0 | 0.0 | s19 | invaded |
| transfer | individual | Circaea lutetiana | Cl9 | 2 | 2.0 | 0.0 | s19 | invaded |
| transfer | species | Epilobium hirsutum | Epilobium hirsutum | 10 | 179.0 | 826.5 | s4 | invaded |
| transfer | individual | Epilobium hirsutum | Eh1 | 6 | 6.0 | 22.3 | s4 | invaded |
| transfer | individual | Epilobium hirsutum | Eh10 | 7 | 7.0 | 46.0 | s4 | invaded |
| transfer | individual | Epilobium hirsutum | Eh11 | 6 | 6.0 | 42.0 | s4 | invaded |
| transfer | individual | Epilobium hirsutum | Eh12 | 5 | 5.0 | 5.0 | s4 | invaded |
| transfer | individual | Epilobium hirsutum | Eh13 | 6 | 6.0 | 26.0 | s4 | invaded |
| transfer | individual | Epilobium hirsutum | Eh14 | 5 | 5.0 | 8.0 | s4 | invaded |
| transfer | individual | Epilobium hirsutum | Eh15 | 4 | 4.0 |  | s4 | invaded |
| transfer | individual | Epilobium hirsutum | Eh16 | 2 | 2.0 |  | s4 | invaded |
| transfer | individual | Epilobium hirsutum | Eh17 | 4 | 4.0 | 4.7 | s4 | invaded |
| transfer | individual | Epilobium hirsutum | Eh18 | 3 | 3.0 | 4.0 | s4 | invaded |
|  | individual | Epilobium hirsutum | Eh19 | 6 | 6.0 | 9.3 | s4 | invaded |
| transfer | individual | Epilobium hirsutum | Eh2 | 4 | 4.0 |  | s4 | invaded |
| transfer | individual | Epilobium hirsutum | Eh20 | 9 | 9.0 | 13.0 | s4 | invaded |
| transfer | individual | Epilobium hirsutum | Eh21 | 6 | 6.0 | 8.7 | s4 | invaded |
| transfer | individual | Epilobium hirsutum | Eh22 | 8 | 8.0 | 18.3 | s4 | invaded |
| transfer | individual | Epilobium hirsutum | Eh23 | 8 | 8.0 | 34.0 | s4 | invaded |
| transfer | individual | Epilobium hirsutum | Eh24 | 6 | 6.0 | 5.0 | s4 | invaded |
| transfer | individual | Epilobium hirsutum | Eh25 | 7 | 7.0 | 23.0 | s4 | invaded |
| transfer | individual | Epilobium hirsutum | Eh26 | 6 | 6.0 | 23.7 | s4 | invaded |
| transfer | individual | Epilobium hirsutum | Eh27 | 5 | 5.0 | 55.0 | s4 | invaded |
| transfer | individual | Epilobium hirsutum | Eh28 | 5 | 5.0 | 132.0 | s4 | invaded |
| transfer | individual | Epilobium hirsutum | Eh29 | 7 | 7.0 | 30.0 | s4 | invaded |
| transfer | individual | Epilobium hirsutum | Eh3 | 5 | 5.0 | 29.3 | s4 | invaded |
| transfer | individual | Epilobium hirsutum | Eh30 | 6 | 6.0 | 1.0 | s4 | invaded |
| transfer | individual | Epilobium hirsutum | Eh31 | 7 | 7.0 | 8.3 | s4 | invaded |
| transfer | individual | Epilobium hirsutum | Eh32 | 2 | 2.0 |  | s4 | invaded |
| transfer | individual | Epilobium hirsutum | Eh33 | 2 | 2.0 |  | s4 | invaded |
| transfer | individual | Epilobium hirsutum | Eh4 | 4 | 4.0 | 139.3 | s4 | invaded |
| transfer | individual | Epilobium hirsutum | Eh5 | 3 | 3.0 |  | s4 | invaded |
| transfer | individual | Epilobium hirsutum | Eh6 | 6 | 6.0 | 46.0 | s4 | invaded |
| transfer | individual | Epilobium hirsutum | Eh7 | 6 | 6.0 | 12.7 | s4 | invaded |
| transfer | individual | Epilobium hirsutum | Eh8 | 6 | 6.0 | 71.5 | s4 | invaded |
| transfer | individual | Epilobium hirsutum | Eh9 | 7 | 7.0 | 8.3 | s4 | invaded |
| transfer | species | Epilobium hirsutum | Epilobium hirsutum | 8 | 1781.3 | 109.2 | s5 | invaded |
| transfer | individual | Epilobium hirsutum | E12 | 1 | 19.7 |  | s5 | invaded |
| transfer | individual | Epilobium hirsutum | Eh1 | 5 | 47.5 | 20.5 | s5 | invaded |
| transfer | individual | Epilobium hirsutum | Eh10 | 4 | 67.0 | 5.5 | s5 | invaded |
| transfer | individual | Epilobium hirsutum | Eh11 | 3 | 182.0 | 20.5 | s5 | invaded |
| transfer | individual | Epilobium hirsutum | Eh12 | 3 | 239.3 | 32.0 | s5 | invaded |
| transfer | individual | Epilobium hirsutum | Eh2 | 2 | 34.0 |  | s5 | invaded |
| transfer | individual | Epilobium hirsutum | Eh3 | 3 | 273.0 |  | s5 | invaded |
| transfer | individual | Epilobium hirsutum | Eh4 | 4 | 158.0 | 5.0 | s5 | invaded |
| transfer | individual | Epilobium hirsutum | Eh5 | 4 | 38.0 | 2.0 | s5 | invaded |
| transfer | individual | Epilobium hirsutum | Eh6 | 4 | 77.0 | 2.0 | s5 | invaded |
| transfer | individual | Epilobium hirsutum | Eh7 | 4 | 228.3 | 12.7 | s5 | invaded |
| transfer | individual | Epilobium hirsutum | Eh8 | 3 | 121.5 | 2.0 | s5 | invaded |
| transfer | individual | Epilobium hirsutum | Eh9 | 3 | 296.0 | 7.0 | s5 | invaded |
| transfer | species | Epilobium hirsutum | Epilobium hirsutum | 10 | 31.0 | 0.7 | s6 | non-invaded |
| transfer | individual | Epilobium hirsutum | Eh1 | 4 | 4.0 | 0.0 | s6 | non-invaded |
| transfer | individual | Epilobium hirsutum | Eh2 | 3 | 3.0 | 0.0 | s6 | non-invaded |
| transfer | individual | Epilobium hirsutum | Eh3 | 3 | 3.0 | 0.0 | s6 | non-invaded |
| transfer | individual | Epilobium hirsutum | Eh4 | 4 | 4.0 | 0.0 | s6 | non-invaded |
| transfer | individual | Epilobium hirsutum | Eh5 | 3 | 3.0 | 0.0 | s6 | non-invaded |
| transfer | individual | Epilobium hirsutum | Eh6 | 3 | 3.0 | 0.0 | s6 | non-invaded |
| transfer | individual | Epilobium hirsutum | Eh7 | 5 | 5.0 | 0.7 | s6 | non-invaded |
| transfer | individual | Epilobium hirsutum | Eh8 | 6 | 6.0 | 0.0 | s6 | non-invaded |
| transfer | species | Epilobium hirsutum | Epilobium hirsutum | 15 | 162.0 | 131.7 | s9 | non-invaded |
| transfer | individual | Epilobium hirsutum | Eh1 | 2 | 2.0 | 0.0 | s9 | non-invaded |
| transfer | individual | Epilobium hirsutum | Eh10 | 4 | 4.0 | 7.0 | s9 | non-invaded |
| transfer | individual | Epilobium hirsutum | Eh11 | 3 | 3.0 | 0.0 | s9 | non-invaded |
| transfer | individual | Epilobium hirsutum | Eh12 | 4 | 4.0 | 3.0 | s9 | non-invaded |
| transfer | individual | Epilobium hirsutum | Eh13 | 3 | 3.0 | 4.0 | s9 | non-invaded |
| transfer | individual | Epilobium hirsutum | Eh14 | 5 | 5.0 | 0.0 | s9 | non-invaded |
| transfer | individual | Epilobium hirsutum | Eh15 | 4 | 4.0 | 0.0 | s9 | non-invaded |
| transfer | individual | Epilobium hirsutum | Eh16 | 1 | 1.0 | 0.0 | s9 | non-invaded |
| transfer | individual | Epilobium hirsutum | Eh17 | 2 | 2.0 | 0.0 | s9 | non-invaded |
| transfer | individual | Epilobium hirsutum | Eh18 | 4 | 4.0 | 1.0 | s9 | non-invaded |
| transfer | individual | Epilobium hirsutum | Eh19 | 2 | 2.0 | 0.0 | s9 | non-invaded |
| transfer | individual | Epilobium hirsutum | Eh2 | 6 | 6.0 | 0.3 | s9 | non-invaded |
| transfer | individual | Epilobium hirsutum | Eh20 | 2 | 2.0 | 0.0 | s9 | non-invaded |
| transfer | individual | Epilobium hirsutum | Eh21 | 4 | 4.0 | 1.0 | s9 | non-invaded |
| transfer | individual | Epilobium hirsutum | Eh22 | 3 | 3.0 | 0.0 | s9 | non-invaded |
| transfer | individual | Epilobium hirsutum | Eh23 | 3 | 3.0 | 0.0 | s9 | non-invaded |
| transfer | individual | Epilobium hirsutum | Eh24 | 3 | 3.0 | 0.0 | s9 | non-invaded |
| transfer | individual | Epilobium hirsutum | Eh25 | 1 | 1.0 | 0.0 | s9 | non-invaded |
| transfer | individual | Epilobium hirsutum | Eh26 | 3 | 3.0 | 31.0 | s9 | non-invaded |
| transfer | individual | Epilobium hirsutum | Eh27 | 3 | 3.0 | 0.0 | s9 | non-invaded |
| transfer | individual | Epilobium hirsutum | Eh28 | 4 | 4.0 | 0.3 | s9 | non-invaded |
| transfer | individual | Epilobium hirsutum | Eh29 | 2 | 2.0 | 0.0 | s9 | non-invaded |
| transfer | individual | Epilobium hirsutum | Eh3 | 2 | 2.0 | 0.0 | s9 | non-invaded |
| transfer | individual | Epilobium hirsutum | Eh30 | 5 | 5.0 | 0.5 | s9 | non-invaded |
| transfer | individual | Epilobium hirsutum | Eh31 | 1 | 1.0 | 0.0 | s9 | non-invaded |
| transfer | individual | Epilobium hirsutum | Eh32 | 4 | 4.0 | 1.0 | s9 | non-invaded |
| transfer | individual | Epilobium hirsutum | Eh33 | 6 | 6.0 | 69.5 | s9 | non-invaded |
| transfer | individual | Epilobium hirsutum | Eh34 | 4 | 4.0 | 10.0 | s9 | non-invaded |
| transfer | individual | Epilobium hirsutum | Eh35 | 6 | 6.0 | 0.0 | s9 | non-invaded |
| transfer | individual | Epilobium hirsutum | Eh36 | 7 | 7.0 | 0.0 | s9 | non-invaded |
| transfer | individual | Epilobium hirsutum | Eh37 | 7 | 7.0 | 0.3 | s9 | non-invaded |
| transfer | individual | Epilobium hirsutum | Eh38 | 3 | 3.0 | 0.0 | s9 | non-invaded |
| transfer | individual | Epilobium hirsutum | Eh39 | 5 | 5.0 | 1.0 | s9 | non-invaded |
| transfer | individual | Epilobium hirsutum | Eh4 | 3 | 3.0 | 0.0 | s9 | non-invaded |
| transfer | individual | Epilobium hirsutum | Eh40 | 3 | 3.0 | 0.0 | s9 | non-invaded |
| transfer | individual | Epilobium hirsutum | Eh41 | 6 | 7.0 | 0.3 | s9 | non-invaded |
| transfer | individual | Epilobium hirsutum | Eh42 | 7 | 9.0 | 0.0 | s9 | non-invaded |
| transfer | individual | Epilobium hirsutum | Eh43 | 2 | 2.0 | 0.0 | s9 | non-invaded |
| transfer | individual | Epilobium hirsutum | Eh44 | 3 | 4.0 | 0.0 | s9 | non-invaded |
| transfer | individual | Epilobium hirsutum | Eh45 | 2 | 2.0 | 0.0 | s9 | non-invaded |
| transfer | individual | Epilobium hirsutum | Eh5 | 5 | 5.0 | 0.3 | s9 | non-invaded |
| transfer | individual | Epilobium hirsutum | Eh6 | 1 | 1.0 | 0.0 | s9 | non-invaded |
| transfer | individual | Epilobium hirsutum | Eh7 | 2 | 2.0 | 0.0 | s9 | non-invaded |
| transfer | individual | Epilobium hirsutum | Eh8 | 3 | 3.0 | 1.0 | s9 | non-invaded |
| transfer | individual | Epilobium hirsutum | Eh9 | 3 | 3.0 | 0.0 | s9 | non-invaded |
| transfer | species | Epilobium hirsutum | Epilobium hirsutum | 18 | 120.0 | 2.3 | s13 | non-invaded |
| transfer | individual | Epilobium hirsutum | Eh1 | 6 | 6.0 | 2.3 | s13 | non-invaded |
| transfer | individual | Epilobium hirsutum | Eh10 | 1 | 1.0 | 0.0 | s13 | non-invaded |
| transfer | individual | Epilobium hirsutum | Eh11 | 2 | 3.0 | 0.0 | s13 | non-invaded |
| transfer | individual | Epilobium hirsutum | Eh12 | 2 | 2.0 | 0.0 | s13 | non-invaded |
| transfer | individual | Epilobium hirsutum | Eh13 | 0 | 1.0 | 0.0 | s13 | non-invaded |
| transfer | individual | Epilobium hirsutum | Eh14 | 1 | 1.0 | 0.0 | s13 | non-invaded |
| transfer | individual | Epilobium hirsutum | Eh15 | 3 | 3.0 | 0.0 | s13 | non-invaded |
| transfer | individual | Epilobium hirsutum | Eh16 | 3 | 3.0 | 0.0 | s13 | non-invaded |
| transfer | individual | Epilobium hirsutum | Eh17 | 1 | 1.0 | 0.0 | s13 | non-invaded |
| transfer | individual | Epilobium hirsutum | Eh18 | 2 | 2.0 | 0.0 | s13 | non-invaded |
| transfer | individual | Epilobium hirsutum | Eh19 | 2 | 2.0 | 0.0 | s13 | non-invaded |
| transfer | individual | Epilobium hirsutum | Eh2 | 4 | 4.0 | 0.0 | s13 | non-invaded |
| transfer | individual | Epilobium hirsutum | Eh20 | 3 | 5.0 | 0.0 | s13 | non-invaded |
| transfer | individual | Epilobium hirsutum | Eh21 | 2 | 3.0 | 0.0 | s13 | non-invaded |
| transfer | individual | Epilobium hirsutum | Eh22 | 2 | 2.0 | 0.0 | s13 | non-invaded |
| transfer | individual | Epilobium hirsutum | Eh23 | 0 | 1.0 | 0.0 | s13 | non-invaded |
| transfer | individual | Epilobium hirsutum | Eh24 | 3 | 3.0 | 0.0 | s13 | non-invaded |
| transfer | individual | Epilobium hirsutum | Eh25 | 1 | 1.0 | 0.0 | s13 | non-invaded |
| transfer | individual | Epilobium hirsutum | Eh26 | 2 | 2.0 | 0.0 | s13 | non-invaded |
| transfer | individual | Epilobium hirsutum | Eh27 | 3 | 3.0 | 0.0 | s13 | non-invaded |
| transfer | individual | Epilobium hirsutum | Eh28 | 3 | 4.0 | 0.0 | s13 | non-invaded |
| transfer | individual | Epilobium hirsutum | Eh29 | 3 | 4.0 | 0.0 | s13 | non-invaded |
| transfer | individual | Epilobium hirsutum | Eh3 | 3 | 4.0 | 0.0 | s13 | non-invaded |
| transfer | individual | Epilobium hirsutum | Eh30 | 4 | 4.0 | 0.0 | s13 | non-invaded |
| transfer | individual | Epilobium hirsutum | Eh31 | 4 | 5.0 | 0.0 | s13 | non-invaded |
| transfer | individual | Epilobium hirsutum | Eh32 | 3 | 3.0 | 0.0 | s13 | non-invaded |
| transfer | individual | Epilobium hirsutum | Eh33 | 3 | 3.0 | 0.0 | s13 | non-invaded |
| transfer | individual | Epilobium hirsutum | Eh34 | 3 | 3.0 | 0.0 | s13 | non-invaded |
| transfer | individual | Epilobium hirsutum | Eh35 | 3 | 4.0 | 0.0 | s13 | non-invaded |
| transfer | individual | Epilobium hirsutum | Eh36 | 5 | 5.0 | 0.0 | s13 | non-invaded |
| transfer | individual | Epilobium hirsutum | Eh37 | 2 | 2.0 | 0.0 | s13 | non-invaded |
| transfer | individual | Epilobium hirsutum | Eh38 | 2 | 3.0 | 0.0 | s13 | non-invaded |
| transfer | individual | Epilobium hirsutum | Eh39 | 3 | 3.0 | 0.0 | s13 | non-invaded |
| transfer | individual | Epilobium hirsutum | Eh4 | 3 | 4.0 | 0.0 | s13 | non-invaded |
| transfer | individual | Epilobium hirsutum | Eh40 | 2 | 2.0 | 0.0 | s13 | non-invaded |
| transfer | individual | Epilobium hirsutum | Eh41 | 3 | 3.0 | 0.0 | s13 | non-invaded |
| transfer | individual | Epilobium hirsutum | Eh5 | 3 | 6.0 | 0.0 | s13 | non-invaded |
| transfer | individual | Epilobium hirsutum | Eh6 | 1 | 1.0 | 0.0 | s13 | non-invaded |
| transfer | individual | Epilobium hirsutum | Eh7 | 3 | 4.0 | 0.0 | s13 | non-invaded |
| transfer | individual | Epilobium hirsutum | Eh8 | 1 | 1.0 | 0.0 | s13 | non-invaded |
| transfer | individual | Epilobium hirsutum | Eh9 | 3 | 3.0 | 0.0 | s13 | non-invaded |
| transfer | species | Epilobium hirsutum | Eh | 11 | 72.0 | 534.0 | s14 | invaded |
| transfer | individual | Epilobium hirsutum | Eh1 | 7 | 7.0 | 9.0 | s14 | invaded |
| transfer | individual | Epilobium hirsutum | Eh10 | 3 | 3.0 | 8.0 | s14 | invaded |
| transfer | individual | Epilobium hirsutum | Eh11 | 5 | 5.0 | 17.0 | s14 | invaded |
| transfer | individual | Epilobium hirsutum | Eh12 | 7 | 7.0 | 7.0 | s14 | invaded |
| transfer | individual | Epilobium hirsutum | Eh13 | 5 | 5.0 | 326.0 | s14 | invaded |
| transfer | individual | Epilobium hirsutum | Eh14 | 5 | 5.0 | 32.0 | s14 | invaded |
| transfer | individual | Epilobium hirsutum | Eh15 | 2 | 2.0 | 0.3 | s14 | invaded |
| transfer | individual | Epilobium hirsutum | Eh16 | 5 | 5.0 | 9.7 | s14 | invaded |
| transfer | individual | Epilobium hirsutum | Eh17 | 3 | 3.0 | 32.3 | s14 | invaded |
| transfer | individual | Epilobium hirsutum | Eh2 | 3 | 3.0 | 2.0 | s14 | invaded |
| transfer | individual | Epilobium hirsutum | Eh3 | 5 | 5.0 | 14.7 | s14 | invaded |
| transfer | individual | Epilobium hirsutum | Eh4 | 2 | 2.0 | 11.3 | s14 | invaded |
| transfer | individual | Epilobium hirsutum | Eh5 | 5 | 5.0 | 33.0 | s14 | invaded |
| transfer | individual | Epilobium hirsutum | Eh6 | 5 | 5.0 | 20.7 | s14 | invaded |
| transfer | individual | Epilobium hirsutum | Eh7 | 3 | 3.0 | 0.3 | s14 | invaded |
| transfer | individual | Epilobium hirsutum | Eh8 | 3 | 3.0 | 1.3 | s14 | invaded |
| transfer | individual | Epilobium hirsutum | Eh9 | 4 | 4.0 | 9.3 | s14 | invaded |
| transfer | species | Epilobium hirsutum | Eh | 8 | 109.0 | 0.0 | s15 | non-invaded |
| transfer | individual | Epilobium hirsutum | Eh1 | 1 | 2.0 | 0.0 | s15 | non-invaded |
| transfer | individual | Epilobium hirsutum | Eh10 | 3 | 3.0 | 0.0 | s15 | non-invaded |
| transfer | individual | Epilobium hirsutum | Eh11 | 3 | 3.0 | 0.0 | s15 | non-invaded |
| transfer | individual | Epilobium hirsutum | Eh12 | 3 | 3.0 | 0.0 | s15 | non-invaded |
| transfer | individual | Epilobium hirsutum | Eh13 | 2 | 2.0 | 0.0 | s15 | non-invaded |
| transfer | individual | Epilobium hirsutum | Eh14 | 3 | 3.0 | 0.0 | s15 | non-invaded |
| transfer | individual | Epilobium hirsutum | Eh15 | 5 | 5.0 | 0.0 | s15 | non-invaded |
| transfer | individual | Epilobium hirsutum | Eh16 | 4 | 4.0 | 0.0 | s15 | non-invaded |
| transfer | individual | Epilobium hirsutum | Eh17 | 3 | 3.0 | 0.0 | s15 | non-invaded |
| transfer | individual | Epilobium hirsutum | Eh18 | 4 | 4.0 | 0.0 | s15 | non-invaded |
| transfer | individual | Epilobium hirsutum | Eh19 | 3 | 3.0 | 0.0 | s15 | non-invaded |
| transfer | individual | Epilobium hirsutum | Eh2 | 2 | 2.0 | 0.0 | s15 | non-invaded |
| transfer | individual | Epilobium hirsutum | Eh20 | 3 | 3.0 | 0.0 | s15 | non-invaded |
| transfer | individual | Epilobium hirsutum | Eh21 | 4 | 4.0 | 0.0 | s15 | non-invaded |
| transfer | individual | Epilobium hirsutum | Eh22 | 5 | 5.0 | 0.0 | s15 | non-invaded |
| transfer | individual | Epilobium hirsutum | Eh23 | 3 | 3.0 | 0.0 | s15 | non-invaded |
| transfer | individual | Epilobium hirsutum | Eh24 | 3 | 3.0 | 0.0 | s15 | non-invaded |
| transfer | individual | Epilobium hirsutum | Eh25 | 3 | 3.0 | 0.0 | s15 | non-invaded |
| transfer | individual | Epilobium hirsutum | Eh26 | 2 | 2.0 | 0.0 | s15 | non-invaded |
| transfer | individual | Epilobium hirsutum | Eh27 | 3 | 3.0 | 0.0 | s15 | non-invaded |
| transfer | individual | Epilobium hirsutum | Eh28 | 4 | 4.0 | 0.0 | s15 | non-invaded |
| transfer | individual | Epilobium hirsutum | Eh29 | 3 | 3.0 | 0.0 | s15 | non-invaded |
| transfer | individual | Epilobium hirsutum | Eh3 | 2 | 2.0 | 0.0 | s15 | non-invaded |
| transfer | individual | Epilobium hirsutum | Eh30 | 3 | 3.0 | 0.0 | s15 | non-invaded |
| transfer | individual | Epilobium hirsutum | Eh31 | 3 | 3.0 | 0.0 | s15 | non-invaded |
| transfer | individual | Epilobium hirsutum | Eh32 | 4 | 4.0 | 0.0 | s15 | non-invaded |
| transfer | individual | Epilobium hirsutum | Eh33 | 3 | 3.0 | 0.0 | s15 | non-invaded |
| transfer | individual | Epilobium hirsutum | Eh34 | 3 | 3.0 | 0.0 | s15 | non-invaded |
| transfer | individual | Epilobium hirsutum | Eh35 | 4 | 4.0 | 0.0 | s15 | non-invaded |
| transfer | individual | Epilobium hirsutum | Eh4 | 3 | 3.0 | 0.0 | s15 | non-invaded |
| transfer | individual | Epilobium hirsutum | Eh5 | 2 | 2.0 | 0.0 | s15 | non-invaded |
| transfer | individual | Epilobium hirsutum | Eh6 | 2 | 2.0 | 0.0 | s15 | non-invaded |
| transfer | individual | Epilobium hirsutum | Eh7 | 4 | 4.0 | 0.0 | s15 | non-invaded |
| transfer | individual | Epilobium hirsutum | Eh8 | 3 | 3.0 | 0.0 | s15 | non-invaded |
| transfer | individual | Epilobium hirsutum | Eh9 | 3 | 3.0 | 0.0 | s15 | non-invaded |
| transfer | species | Epilobium hirsutum | Eh | 14 | 4169.2 | 204.7 | s16 | invaded |
| transfer | individual | Epilobium hirsutum | Eh1 | 3 | 198.0 | 0.0 | s16 | invaded |
| transfer | individual | Epilobium hirsutum | Eh10 | 1 | 8.0 | 0.0 | s16 | invaded |
| transfer | individual | Epilobium hirsutum | Eh11 | 4 | 347.0 | 12.0 | s16 | invaded |
| transfer | individual | Epilobium hirsutum | Eh12 | 5 | 51.7 | 0.3 | s16 | invaded |
| transfer | individual | Epilobium hirsutum | Eh13 | 5 | 94.7 | 21.0 | s16 | invaded |
| transfer | individual | Epilobium hirsutum | Eh14 | 3 | 18.7 | 0.0 | s16 | invaded |
| transfer | individual | Epilobium hirsutum | Eh15 | 3 | 22.5 | 0.5 | s16 | invaded |
| transfer | individual | Epilobium hirsutum | Eh16 | 6 | 183.5 | 1.0 | s16 | invaded |
| transfer | individual | Epilobium hirsutum | Eh17 | 5 | 382.7 | 2.0 | s16 | invaded |
| transfer | individual | Epilobium hirsutum | Eh18 | 4 | 52.3 | 1.3 | s16 | invaded |
| transfer | individual | Epilobium hirsutum | Eh19 | 2 | 61.3 | 0.0 | s16 | invaded |
| transfer | individual | Epilobium hirsutum | Eh2 | 3 | 216.3 | 0.0 | s16 | invaded |
| transfer | individual | Epilobium hirsutum | Eh20 | 2 | 43.0 | 0.0 | s16 | invaded |
| transfer | individual | Epilobium hirsutum | Eh21 | 4 | 315.5 | 9.0 | s16 | invaded |
| transfer | individual | Epilobium hirsutum | Eh22 | 2 | 62.3 | 0.0 | s16 | invaded |
| transfer | individual | Epilobium hirsutum | Eh23 | 3 | 145.0 | 2.7 | s16 | invaded |
| transfer | individual | Epilobium hirsutum | Eh24 | 3 | 57.3 | 0.0 | s16 | invaded |
| transfer | individual | Epilobium hirsutum | Eh25 | 5 | 152.7 | 0.0 | s16 | invaded |
| transfer | individual | Epilobium hirsutum | Eh26 | 1 | 2.0 | 0.0 | s16 | invaded |
| transfer | individual | Epilobium hirsutum | Eh27 | 1 | 6.0 | 0.0 | s16 | invaded |
| transfer | individual | Epilobium hirsutum | Eh28 | 5 | 86.0 | 3.0 | s16 | invaded |
| transfer | individual | Epilobium hirsutum | Eh29 | 1 | 24.0 | 0.0 | s16 | invaded |
| transfer | individual | Epilobium hirsutum | Eh3 | 4 | 126.0 | 1.3 | s16 | invaded |
| transfer | individual | Epilobium hirsutum | Eh30 | 2 | 3.0 | 0.0 | s16 | invaded |
| transfer | individual | Epilobium hirsutum | Eh31 | 6 | 128.0 | 18.7 | s16 | invaded |
| transfer | individual | Epilobium hirsutum | Eh32 | 2 | 51.0 | 0.0 | s16 | invaded |
| transfer | individual | Epilobium hirsutum | Eh33 | 5 | 122.3 | 5.3 | s16 | invaded |
| transfer | individual | Epilobium hirsutum | Eh34 | 4 | 118.0 | 12.7 | s16 | invaded |
| transfer | individual | Epilobium hirsutum | Eh35 | 2 | 46.0 | 0.0 | s16 | invaded |
| transfer | individual | Epilobium hirsutum | Eh36 | 4 | 165.0 | 49.5 | s16 | invaded |
| transfer | individual | Epilobium hirsutum | Eh37 | 2 | 26.0 | 0.0 | s16 | invaded |
| transfer | individual | Epilobium hirsutum | Eh4 | 2 | 45.3 | 0.0 | s16 | invaded |
| transfer | individual | Epilobium hirsutum | Eh5 | 3 | 189.7 | 0.0 | s16 | invaded |
| transfer | individual | Epilobium hirsutum | Eh6 | 6 | 252.3 | 57.3 | s16 | invaded |
| transfer | individual | Epilobium hirsutum | Eh7 | 4 | 104.3 | 0.0 | s16 | invaded |
| transfer | individual | Epilobium hirsutum | Eh8 | 7 | 131.7 | 5.3 | s16 | invaded |
| transfer | individual | Epilobium hirsutum | Eh9 | 2 | 130.0 | 1.7 | s16 | invaded |
| transfer | species | Epilobium hirsutum | Eh | 8 | 113.0 | 25.5 | s17 | non-invaded |
| transfer | individual | Epilobium hirsutum | Eh1 | 8 | 8.0 | 1.0 | s17 | non-invaded |
| transfer | individual | Epilobium hirsutum | Eh10 | 4 | 4.0 | 0.0 | s17 | non-invaded |
| transfer | individual | Epilobium hirsutum | Eh11 | 4 | 4.0 | 0.0 | s17 | non-invaded |
| transfer | individual | Epilobium hirsutum | Eh12 | 4 | 4.0 | 0.0 | s17 | non-invaded |
| transfer | individual | Epilobium hirsutum | Eh13 | 5 | 5.0 | 0.0 | s17 | non-invaded |
| transfer | individual | Epilobium hirsutum | Eh14 | 6 | 6.0 | 2.7 | s17 | non-invaded |
| transfer | individual | Epilobium hirsutum | Eh15 | 4 | 4.0 | 0.0 | s17 | non-invaded |
| transfer | individual | Epilobium hirsutum | Eh16 | 2 | 2.0 | 0.0 | s17 | non-invaded |
| transfer | individual | Epilobium hirsutum | Eh17 | 1 | 1.0 | 0.0 | s17 | non-invaded |
| transfer | individual | Epilobium hirsutum | Eh18 | 1 | 1.0 | 0.0 | s17 | non-invaded |
| transfer | individual | Epilobium hirsutum | Eh19 | 3 | 3.0 | 0.5 | s17 | non-invaded |
| transfer | individual | Epilobium hirsutum | Eh2 | 4 | 4.0 | 0.0 | s17 | non-invaded |
| transfer | individual | Epilobium hirsutum | Eh20 | 2 | 2.0 | 0.0 | s17 | non-invaded |
| transfer | individual | Epilobium hirsutum | Eh21 | 4 | 4.0 | 0.0 | s17 | non-invaded |
| transfer | individual | Epilobium hirsutum | Eh22 | 3 | 3.0 | 0.0 | s17 | non-invaded |
| transfer | individual | Epilobium hirsutum | Eh23 | 2 | 2.0 | 0.0 | s17 | non-invaded |
| transfer | individual | Epilobium hirsutum | Eh24 | 4 | 4.0 | 1.0 | s17 | non-invaded |
| transfer | individual | Epilobium hirsutum | Eh25 | 6 | 6.0 | 4.0 | s17 | non-invaded |
| transfer | individual | Epilobium hirsutum | Eh26 | 4 | 4.0 | 0.0 | s17 | non-invaded |
| transfer | individual | Epilobium hirsutum | Eh27 | 5 | 5.0 | 3.0 | s17 | non-invaded |
| transfer | individual | Epilobium hirsutum | Eh28 | 4 | 4.0 | 0.0 | s17 | non-invaded |
| transfer | individual | Epilobium hirsutum | Eh29 | 5 | 5.0 | 1.0 | s17 | non-invaded |
| transfer | individual | Epilobium hirsutum | Eh3 | 6 | 6.0 | 0.3 | s17 | non-invaded |
| transfer | individual | Epilobium hirsutum | Eh30 | 4 | 4.0 | 0.0 | s17 | non-invaded |
| transfer | individual | Epilobium hirsutum | Eh4 | 5 | 5.0 | 0.0 | s17 | non-invaded |
| transfer | individual | Epilobium hirsutum | Eh5 | 3 | 3.0 | 10.0 | s17 | non-invaded |
| transfer | individual | Epilobium hirsutum | Eh6 | 1 | 1.0 | 0.0 | s17 | non-invaded |
| transfer | individual | Epilobium hirsutum | Eh7 | 5 | 5.0 | 2.0 | s17 | non-invaded |
| transfer | individual | Epilobium hirsutum | Eh8 | 3 | 3.0 | 0.0 | s17 | non-invaded |
| transfer | individual | Epilobium hirsutum | Eh9 | 1 | 1.0 | 0.0 | s17 | non-invaded |
| transfer | species | Epilobium hirsutum | Eh | 10 | 3710.7 | 731.0 | s18 | invaded |
| transfer | individual | Epilobium hirsutum | Eh1 | 2 | 267.0 | 0.0 | s18 | invaded |
| transfer | individual | Epilobium hirsutum | Eh10 | 4 | 295.7 | 61.7 | s18 | invaded |
| transfer | individual | Epilobium hirsutum | Eh11 | 4 | 282.7 | 11.7 | s18 | invaded |
| transfer | individual | Epilobium hirsutum | Eh12 | 7 | 394.3 | 146.7 | s18 | invaded |
| transfer | individual | Epilobium hirsutum | Eh2 | 4 | 808.0 | 378.0 | s18 | invaded |
| transfer | individual | Epilobium hirsutum | Eh3 | 4 | 94.0 | 10.0 | s18 | invaded |
| transfer | individual | Epilobium hirsutum | Eh4 | 2 | 192.0 | 0.0 | s18 | invaded |
| transfer | individual | Epilobium hirsutum | Eh5 | 3 | 324.0 | 14.0 | s18 | invaded |
| transfer | individual | Epilobium hirsutum | Eh6 | 4 | 336.0 | 0.0 | s18 | invaded |
| transfer | individual | Epilobium hirsutum | Eh7 | 6 | 318.0 | 103.0 | s18 | invaded |
| transfer | individual | Epilobium hirsutum | Eh8 | 3 | 318.0 | 5.0 | s18 | invaded |
| transfer | individual | Epilobium hirsutum | Eh9 | 2 | 81.0 | 1.0 | s18 | invaded |

**Table S2**

| **plant species** | **code** | **insect species** | **code** |
| --- | --- | --- | --- |
| *Alliaria petiolata* | Ap | *Apis mellifera* | Am |
| *Angelica sylvestris* | As | *Bombus hortorum* | Bh |
| *Anthriscus sylvestris* | Ans | *Bombus lucorum* | Bl |
| *Asteraceae 1* | Ast1 | *Bombus pascuorum* | Bp |
| *Asteraceae 2* | Ast2 | *Bombus pratorum* | Bpr |
| *Bellis* | Bel | *Bombus terrestris* | Bt |
| *Brassica sp1* | Bras1 | *Brachypterus urticae* | Bu |
| *Calystegia sepium* | Cs | *Epistrophe grassulariae* | Eg |
| *Circaea lutetiana* | Cl | *Episyrphus balteatus* | Eb |
| *Cirsium spp.* | Cir | *Eristalis pertinax* | Ep |
| *Cirsium type* | Ct | *Eusphalerum luteum* | El |
| *Epilobium spp.* | Epi | *Forficula auricularia* | Fa |
| *Epilobium* | Ep | *Forficula sp.* | For |
| *Epilobium hirsutum* | Eh | *Gasteruption spp.* | Gas |
| *Epilobium montanum* | Em | *Hemiptera 1* | Hem1 |
| *Eupatorium cannabinum* | Ec | *Melangyna sp.* | Mel |
| *Filipendula ulmaria* | Fu | *Melanostoma scalare* | Ms |
| *Galium aparine* | Ga | *Meligethes aeneus* | Ma |
| *Geranium* | Ge | *Melinda viridicyanea* | Mv |
| *Geranium robertianum* | Gr | *Myathropa florea* | Mf |
| *Geum urbanum* | Gu | *Orthotylus/Lygocorus* | O/L |
| *Hedera helix* | Hf | *Parasitica* | Par |
| *Heracleum sphondylium* | Hs | *Phania funesta* | Pf |
| *Impatiens glandulifera* | Ig | *Platycheirus albimanus* | Pal |
| *Lamiaceae* | Lam | *Platycheirus aurolateralis* | Pau |
| *Lantana camara* | Lc | *Pollenia angustigena* | Pan |
| *Lythrum salicaria* | Ls | *Rhagonycha fulva* | Rf |
| M1 | M1 | *Rhamphomyia (s.s.) variabilis* | Rv |
| M2 | M2 | *Symmorphus mutinensis* | Sm |
| M4 | M4 | *Syrphus ribesii* | Sr |
| M5 | M5 |  |  |
| M6 | M6 |  |  |
| M8 | M8 |  |  |
| M9 | M9 |  |  |
| NI/Unknown | NI |  |  |
| *Pseudobrassica* | Ps |  |  |
| *Rubus* | Ru |  |  |
| *Rubus fruticosus* | Rf |  |  |
| *Rununculus spp.* | Run |  |  |
| *Sambucus spp.* | Sam |  |  |
| *Senecio jacobaea* | Sj |  |  |
| *Senecio spp.* | Sen |  |  |
| *Senecio type* | St |  |  |
| *Silene dioica* | Sd |  |  |
| *Sonchus type* | Son |  |  |
| *Taraxacum type* | Tar |  |  |
| *Trifolium spp.* | Tri |  |  |
| *Trifolium dubium* | Td |  |  |

**Table S3**

| **Network type** | **Scale** | **Site** | **Treatment** | **N**  **pollen sp** | **N indiv/**  **species** | **H2** | **Interaction evenness** | **Niche overlap HL** | **Niche overlap LL** |
| --- | --- | --- | --- | --- | --- | --- | --- | --- | --- |
| Transfer | Individual | s1 | invaded | 35 | 77 | 0.67 | 0.64 | 0.06 | 0.39 |
| s2 | non-invaded | 33 | 86 | 0.88 | 0.77 | 0.08 | 0.26 |
| s3 | non-invaded | 44 | 84 | 0.87 | 0.73 | 0.04 | 0.15 |
| s4 | invaded | 21 | 102 | 0.44 | 0.80 | 0.05 | 0.38 |
| s5 | invaded | 26 | 74 | 0.85 | 0.69 | 0.04 | 0.13 |
| s6 | non-invaded | 34 | 122 | 0.90 | 0.77 | 0.03 | 0.19 |
| s7 | non-invaded | 25 | 62 | 0.75 | 0.75 | 0.08 | 0.45 |
| s8 | invaded | 20 | 63 | 0.72 | 0.66 | 0.05 | 0.43 |
| s9 | non-invaded | 26 | 68 | 0.73 | 0.84 | 0.05 | 0.25 |
| s10 | invaded | 32 | 86 | 0.91 | 0.69 | 0.04 | 0.26 |
| s11 | invaded | 24 | 74 | 0.92 | 0.81 | 0.03 | 0.10 |
| s12 | non-invaded | 28 | 59 | 0.90 | 0.82 | 0.02 | 0.06 |
| s13 | non-invaded | 35 | 79 | 0.91 | 0.79 | 0.03 | 0.22 |
| s14 | invaded | 34 | 71 | 0.89 | 0.73 | 0.04 | 0.09 |
| s15 | non-invaded | 29 | 87 | 0.84 | 0.80 | 0.02 | 0.17 |
| s16 | invaded | 26 | 87 | 0.86 | 0.77 | 0.02 | 0.15 |
| s17 | non-invaded | 14 | 51 | 0.72 | 0.76 | 0.09 | 0.37 |
| s18 | invaded | 23 | 44 | 0.81 | 0.75 | 0.04 | 0.13 |
| s19 | invaded | 8 | 35 | 0.97 | 0.79 | 0.06 | 0.56 |
| s20 | non-invaded | 14 | 44 | 0.98 | 0.82 | 0.16 | 0.21 |
| Species | s1 | invaded | 35 | 11 | 0.80 | 0.27 | 0.20 | 0.05 |
| s2 | non-invaded | 33 | 9 | 0.95 | 0.25 | 0.23 | 0.02 |
| s3 | non-invaded | 44 | 13 | 0.94 | 0.36 | 0.19 | 0.02 |
| s4 | invaded | 21 | 6 | 0.50 | 0.50 | 0.30 | 0.21 |
| s5 | invaded | 26 | 14 | 0.94 | 0.42 | 0.10 | 0.05 |
| s6 | non-invaded | 34 | 12 | 0.97 | 0.29 | 0.20 | 0.02 |
| s7 | non-invaded | 25 | 4 | 0.92 | 0.41 | 0.76 | 0.09 |
| s8 | invaded | 20 | 10 | 0.82 | 0.43 | 0.25 | 0.05 |
| s9 | non-invaded | 26 | 8 | 0.98 | 0.40 | 0.30 | 0.00 |
| s10 | invaded | 32 | 14 | 0.98 | 0.17 | 0.11 | 0.01 |
| s11 | invaded | 24 | 17 | 0.97 | 0.41 | 0.05 | 0.02 |
| s12 | non-invaded | 28 | 18 | 0.96 | 0.48 | 0.04 | 0.01 |
| s13 | non-invaded | 35 | 15 | 0.99 | 0.39 | 0.21 | 0.01 |
| s14 | invaded | 34 | 17 | 0.97 | 0.36 | 0.09 | 0.00 |
| s15 | non-invaded | 29 | 17 | 0.98 | 0.30 | 0.07 | 0.01 |
| s16 | invaded | 26 | 15 | 0.95 | 0.38 | 0.22 | 0.01 |
| s17 | non-invaded | 14 | 7 | 0.90 | 0.26 | 0.27 | 0.07 |
| s18 | invaded | 23 | 13 | 0.95 | 0.33 | 0.13 | 0.04 |
| s19 | invaded | 8 | 4 | 0.99 | 0.25 | 0.34 | 0.00 |
| s20 | non-invaded | 14 | 7 | 0.99 | 0.35 | 0.21 | 1.48 |
| Transport | Individual | A | Invaded/control | 18 | 51 | 0.87 | 0.58 | 0.05 | 0.44 |
| A | non-invaded/exp | 16 | 17 | 0.53 | 0.60 | 0.16 | 0.62 |
| B | Invaded/control | 20 | 61 | 0.79 | 0.60 | 0.06 | 0.38 |
| B | non-invaded/exp | 14 | 18 | 0.88 | 0.46 | 0.09 | 0.57 |
| C | Invaded/control | 20 | 46 | 0.91 | 0.66 | 0.03 | 0.41 |
| C | non-invaded/exp | 17 | 26 | 0.88 | 0.27 | 0.10 | 0.26 |
| D | Invaded/ | 12 | 33 | 0.94 | 0.56 | 0.09 | 0.45 |
| D | non-invaded | 12 | 10 | 0.74 | 0.68 | 0.20 | 0.38 |
| Species | A | invaded | 18 | 21 | 0.81 | 0.24 | 0.18 | 0.32 |
| A | non-invaded | 12 | 17 | 0.55 | 0.57 | 0.20 | 0.64 |
| B | invaded | 20 | 35 | 0.83 | 0.34 | 0.08 | 0.29 |
| B | non-invaded | 14 | 16 | 0.86 | 0.45 | 0.11 | 0.55 |
| C | invaded | 24 | 30 | 0.83 | 0.32 | 0.18 | 0.31 |
| C | non-invaded | 17 | 17 | 0.84 | 0.26 | 0.15 | 0.22 |
| D | invaded | 12 | 18 | 0.94 | 0.15 | 0.15 | 0.39 |
| D | non-invaded | 12 | 9 | 0.74 | 0.68 | 0.20 | 0.34 |

**Fig S1**.


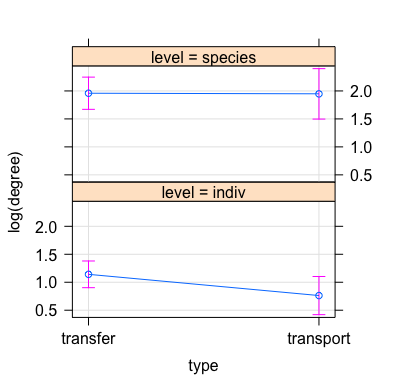


**Fig S2.**


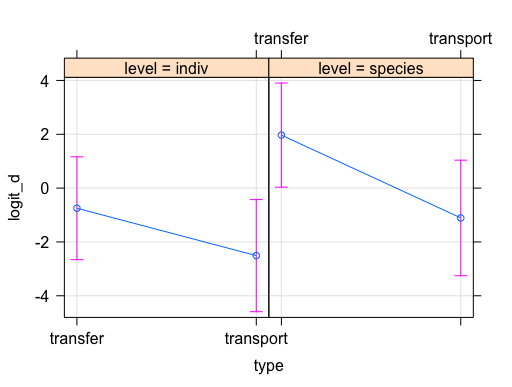


**Fig S3**


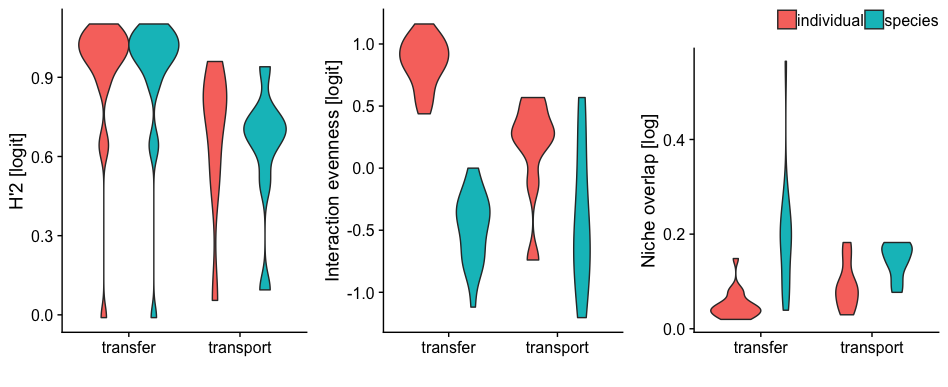

Supplement: mmc1 [file S2530064423000226:mmc1.docx]
